# Supplementary material for: A cyclic tetra-nuclear dinitrosyl iron complex [Fe(NO)2(imidazolate)]4: synthesis, structure and stability
Source: Royal Society of Chemistry journal article supplement (doi:10.1039/b412086h), 2004-12-14
Supplement: b412086h.pdf [file b412086h.pdf]

# Supplementary Material (ESI) for Chemical Communications  
# This journal is © The Royal Society of Chemistry 2004

## Electronic Supplementary Information:

### (1) Crystal data table

---

|                                           |                                                                                                                               |
|-------------------------------------------|-------------------------------------------------------------------------------------------------------------------------------|
| Chemical formula                          | C <sub>12</sub> H <sub>12</sub> Fe <sub>4</sub> N <sub>16</sub> O <sub>8</sub> , C <sub>3</sub> H <sub>6</sub> O <sub>1</sub> |
| Formula weight                            | 789.85                                                                                                                        |
| Temperature, K                            | 243                                                                                                                           |
| Crystal system                            | Monoclinic                                                                                                                    |
| Space group                               | C2/c                                                                                                                          |
| Unit cell dimensions                      |                                                                                                                               |
| a                                         | 21.30 (3)                                                                                                                     |
| b                                         | 6.709 (9)                                                                                                                     |
| c                                         | 22.73 (3)                                                                                                                     |
| $\alpha$                                  | 90                                                                                                                            |
| $\beta$                                   | 103.93 (4)                                                                                                                    |
| $\chi$                                    | 90                                                                                                                            |
| Volume                                    | 3153 (7)                                                                                                                      |
| Z                                         | 4                                                                                                                             |
| Density (calculated), mg/m <sup>3</sup>   | 1.664                                                                                                                         |
| Absorption coefficient, mm <sup>-1</sup>  | 1.871                                                                                                                         |
| Crystal size [mm]                         | 0.4 x 0.10 x 0.07                                                                                                             |
| Diffractometer/scan                       | Bruker SMART/CCD                                                                                                              |
| Scan                                      | $\omega$ scan                                                                                                                 |
| $\theta$ range for data collection, deg   | 1.85 to 28.26                                                                                                                 |
| Reflections measured                      | 13412                                                                                                                         |
| Independent. observed reflections         | 3678                                                                                                                          |
| Independent reflections [ $ I  > 2s(I)$ ] | 3085                                                                                                                          |
| R <sub>int</sub>                          | 0.086                                                                                                                         |
| Data/restraints/parameters                | 3678/0/201                                                                                                                    |
| Goodness of fit on F <sup>2</sup>         | 1.196                                                                                                                         |
| Final R indices [ $ I  > 2s(I)$ ]         | R <sub>1</sub> =0.0597, wR <sub>2</sub> =0.1475                                                                               |
| R indices (all data)                      | R <sub>1</sub> =0.0706, wR <sub>2</sub> =0.1535                                                                               |

---

(2) **FT-IR spectra of the nitrosyl and carbonyl regions of** (a)  $\text{Fe}(\text{CO})_2(\text{NO})_2$  in  $\text{CH}_2\text{Cl}_2$ , (b)  $\text{Fe}(\text{NO})_2(\text{CO})(\text{Imidazole})$ , **2**, in  $\text{CH}_2\text{Cl}_2$  and (c)  $[\text{Fe}(\text{NO})_2(\text{Im-H})]_4$ , **1**, in a KBr pellet.

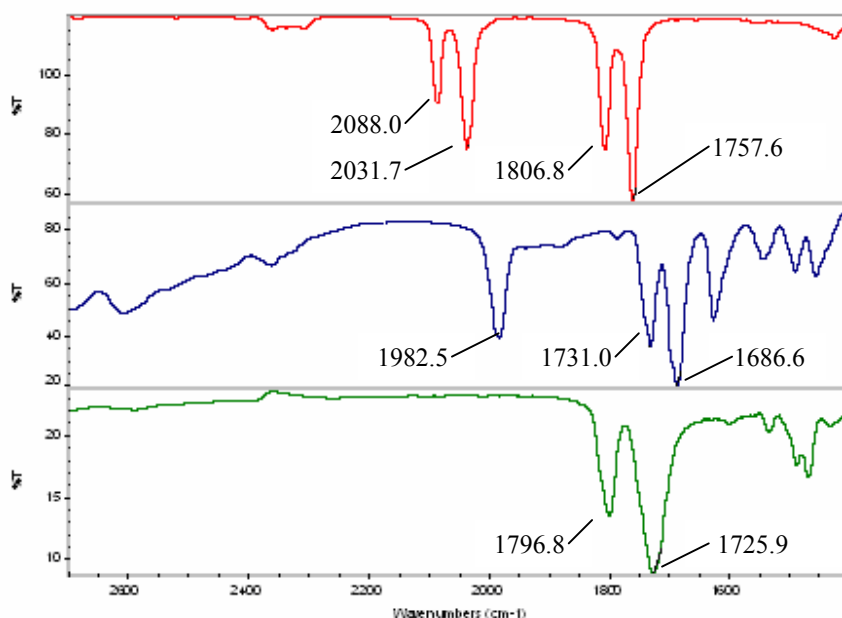

(3) A scheme showing the fragmentation of  $[\text{Fe}(\text{NO})_2(\text{Im-H})]_4$  in coordinating solvents, which give rise to the species responsible for the EPR spectrum shown in Figure 2(a).

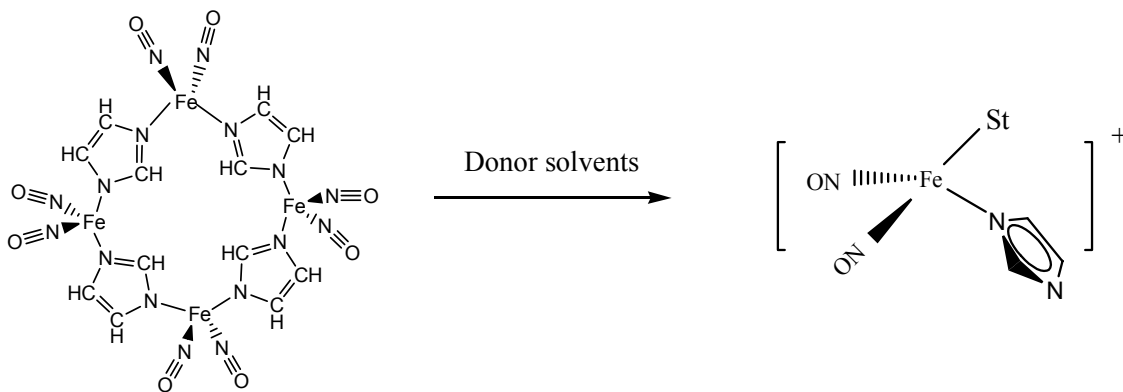

(4) **Conditions for the TGA experiment.**

The TGA was performed on a Mettler TGA/sDTA 851e. The conditions were 9.62 mg starting mass, starting at  $25^\circ\text{C}$  to  $1000^\circ\text{C}$  with a ramp of  $10^\circ\text{C}/\text{min}$ . An isothermal run was performed prior to heating for 20 min at  $25^\circ\text{C}$  to purge the system with  $\text{N}_2$ .
